# Supplementary material
Source: PubMed Central journal article supplement (PMC4775865)
Supplement: thnov06p0558s1.pdf [file thnov06p0558s1.pdf]

## Supplementary figures and tables

### Figure S1. p38 $\alpha$ , AMPK $\alpha$ 1, and JNK are not responsible for Hsp27-induced cell migration and invasion

(A-B) Transwell assays were performed when SK-Hep1-Hsp27 cells were preincubated with inhibitors of p38 $\alpha$ , AMPK $\alpha$ 1, or JNK signaling (magnification,  $\times 200$ ).

A

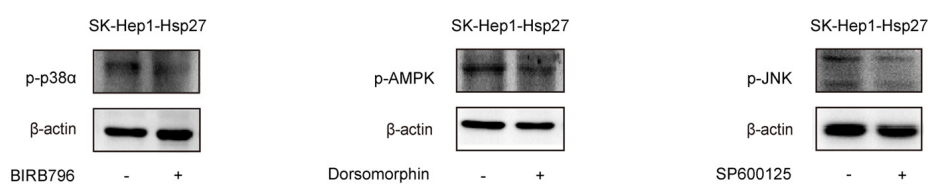

B

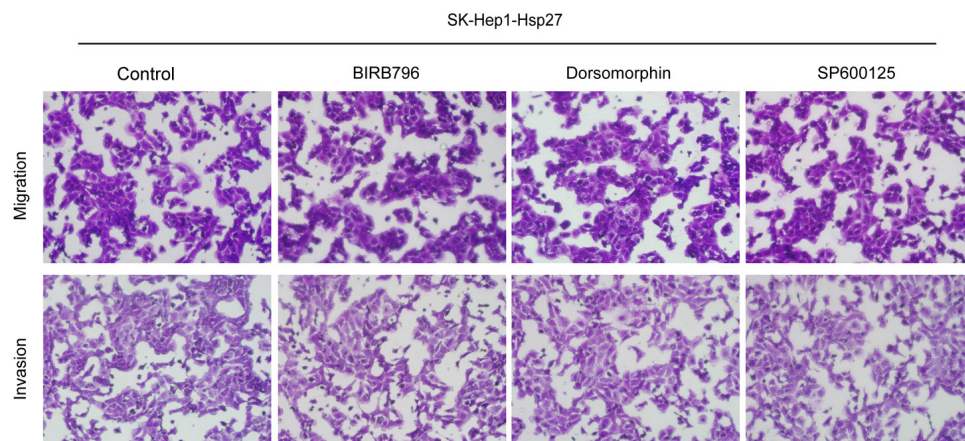

**Figure S2. Inhibitory effect of Akt siRNA on migration and invasion of SK-Hep1-Hsp 27 and MHCC97H cells**

(A-B) SK-Hep1-Hsp 27 and MHCC97H cells were treated with Akt siRNA. Migration and matrigel invasion assays were done for SK-Hep1-Hsp 27 and MHCC97H cells following treatment with Akt siRNA (magnification, ×200).

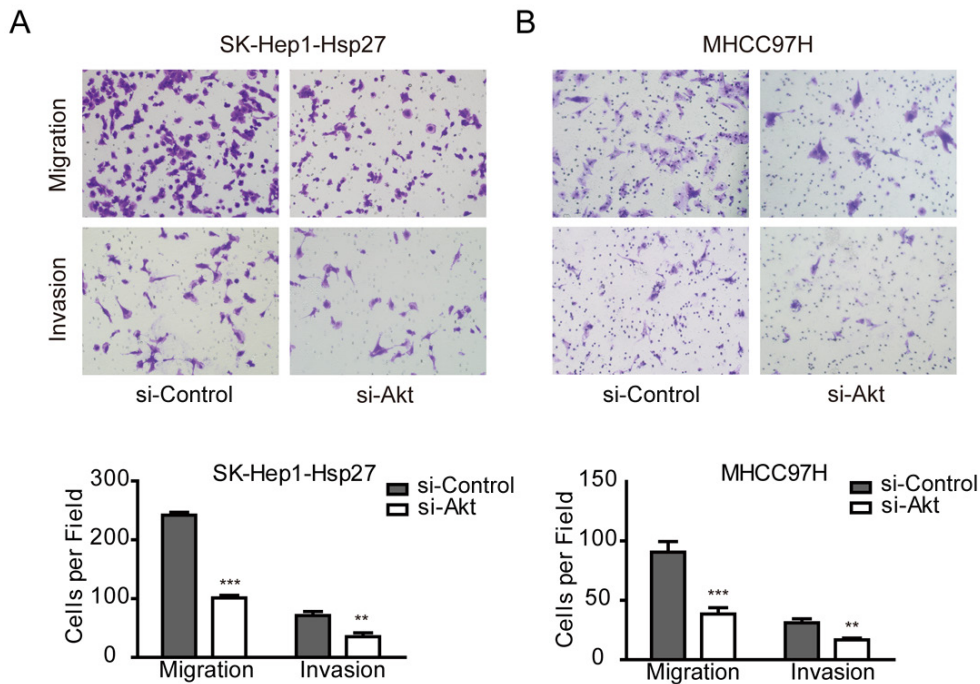

**Figure S3. Effect of Akt inhibitor on candidate genes.**

(A-C) SK-Hep1-Hsp27 and MHCC97H cells were treated with Akt inhibitor LY294002. Quantitative real-time PCR was performed to evaluate the relative expression of ITGB3, EPHB2 and ETV4 in the indicated cells.

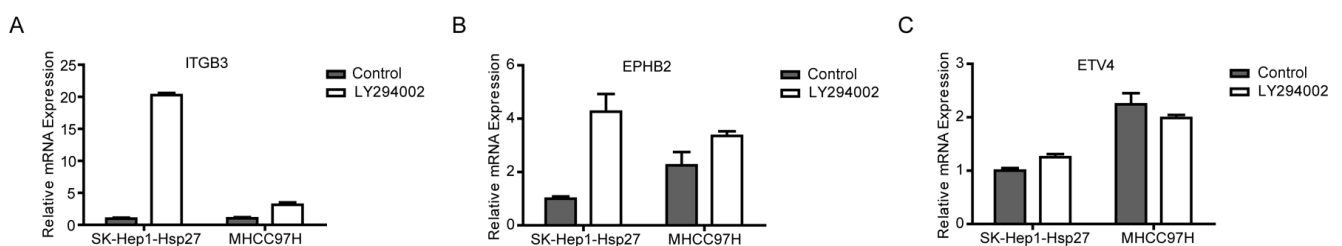

**Table S1. Primers used in quantitative real-time PCR**

| Gene           | Forward(5'-3')         | Reverse (5'-3')        |
|----------------|------------------------|------------------------|
| Hsp27          | ACGGTCAAGACCAAGGATGG   | AGGGAGGAGGAAACTTGGT    |
| ITGA7          | ATTTCCCTTGCATTCGCTGG   | CGTCCAGATTGAAGGCGACA   |
| ITGB3          | CATCACCATCCACGACCGAA   | GTGCCCCGGTACGTGATATT   |
| MMP2           | CTCCAATCCCACCAACCCTC   | CCAGTGCCCTCTTGAGACAG   |
| EPHB2          | ACATGCAACTCAAACGACGG   | GCATGAATCTCCCAAGCCCT   |
| ETV4           | TGAGAAACCTCTGCGACCA    | TGGGCATTTGTTGGGTCAT    |
| $\beta$ -actin | TTGTTACAGGAAGTCCCTTGCC | ATGCTATCACCTCCCCTGTGTG |

**Table S2.siRNAs of target genes**

| siRNA       | Forward(5'-3')          | Reverse (5'-3')         |
|-------------|-------------------------|-------------------------|
| hs-ITGA7-si | CAGCAGCUAUAGCCCUACUdTdT | AGUAGGGCUAUAGCUGCUGdTdT |
| hs-MMP2-si  | CCACAGCCAACUACGAUGAdTdT | UCAUCGUAGUUGGCUGUGGdTdT |
